# Supplementary material for: Zinc finger protein Zfp335 is required for the formation of the naïve T cell compartment
Source: PubMed Central journal article supplement (PMC4371841; doi:10.7554/elife.03549), 2014-10-24

**Supplementary File 1: Genes differentially expressed in mature CD4SP thymocytes and RTEs (*blt/blt* vs. WT)**

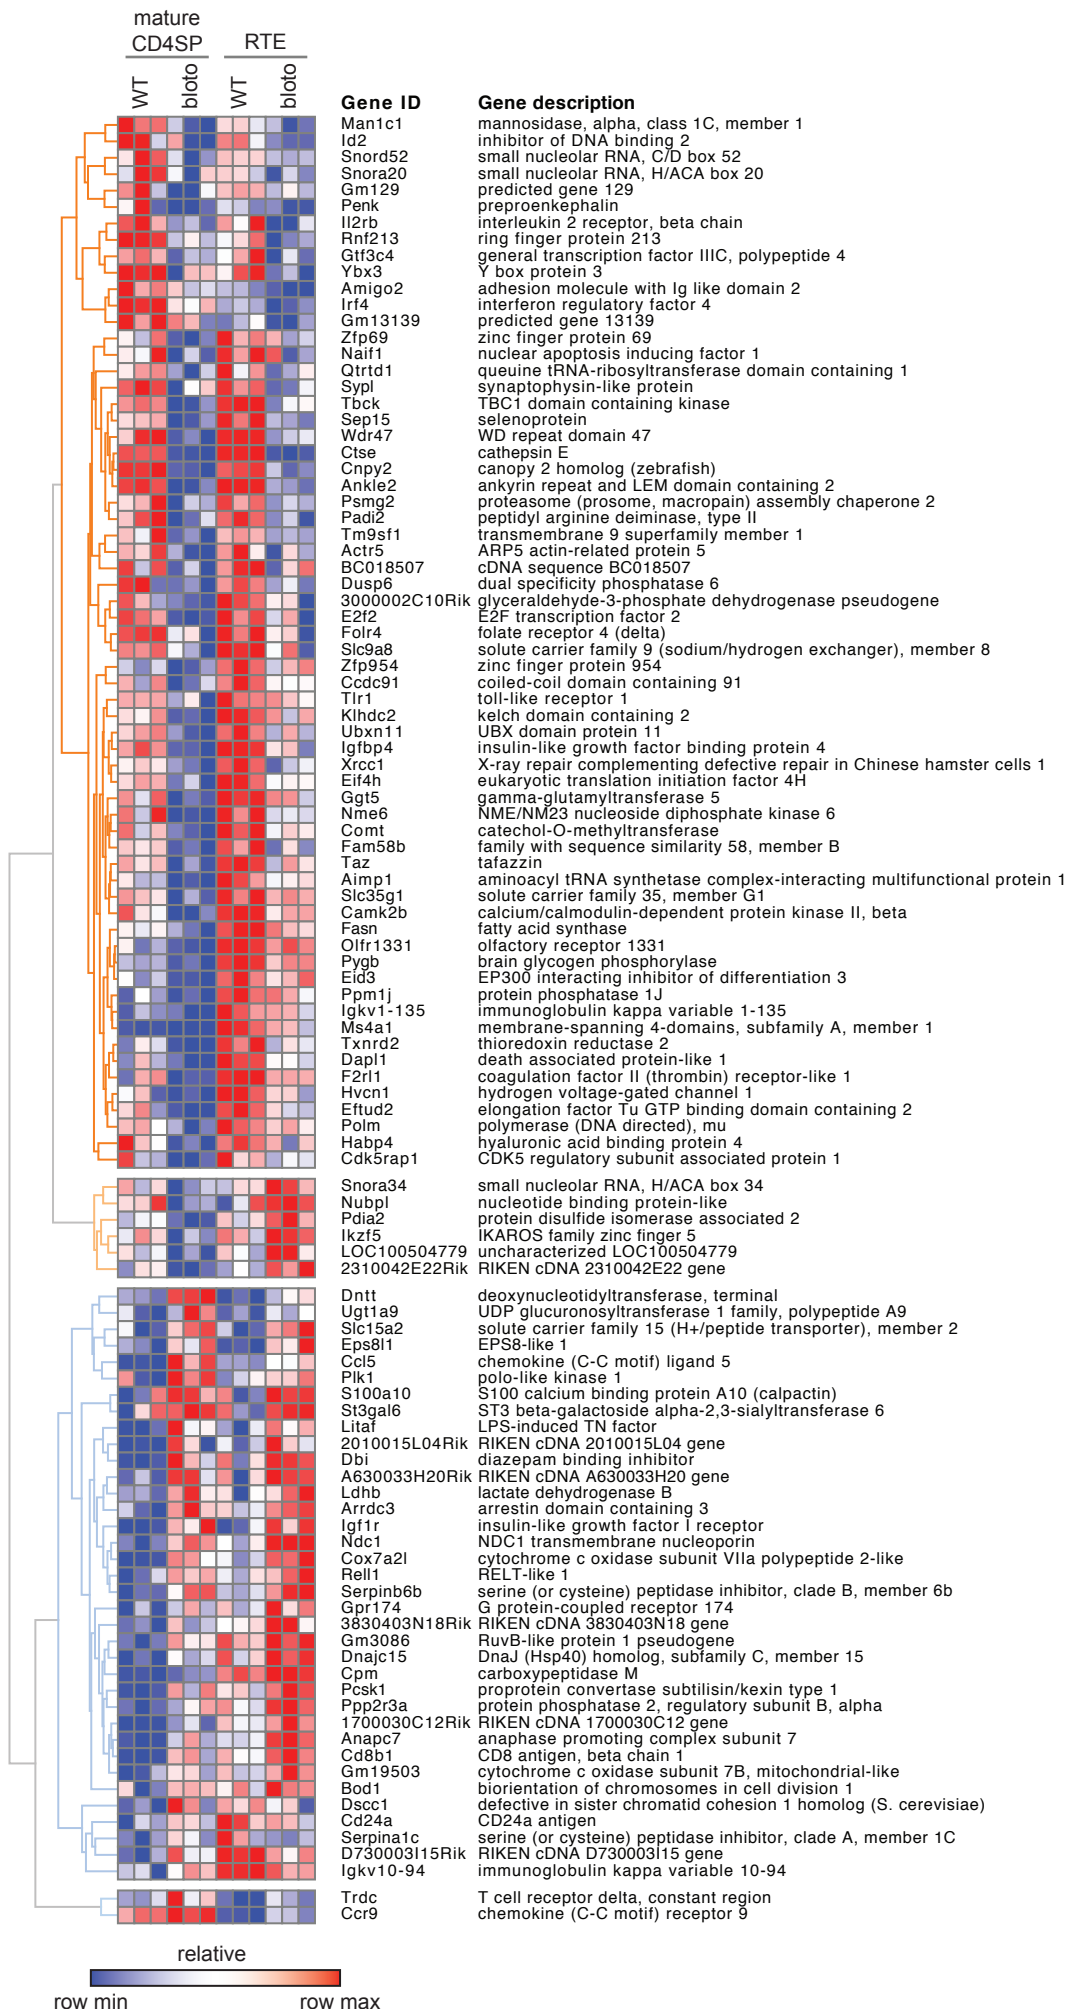

Supplement: elife03549s001.pdf [file elife03549s001.pdf]
